# Supplementary material
Source: Springer Nature journal article supplement (https://www.springermedizin.de/resource/supplementary/13063_2012_1345_MOESM5_ESM.pdf/9619888)
Supplement: MOESM5 [file 9619888]

'Raw data'

Table of correspondence between 21 trialed interventions and 25 suggestions on content

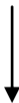

Data preparation

Table of correspondence between 21 trialed interventions and 9 suggestions on content

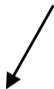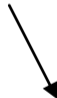

Analysis One

Exploration for patterns in the data in relation to effective interventions

Analysis Two

Exploration for patterns in the data in relation to ineffective interventions
